# Supplementary material for: Molecular blueprints for cleaner air: theoretical insights into Cu(i)-decorated heterocycles for greenhouse gas (CO/CO2/CH4) capture
Source: Royal Society of Chemistry journal article supplement (doi:10.1039/d5ra08553e), 2026-04-07
Supplement: d5ra08553e1.pdf [file d5ra08553e1.pdf]

## Supporting Information File

### Molecular Blueprints for Cleaner Air: Theoretical Insights into Cu(I)-decorated Heterocycles for Green House Gases (CO/CO<sub>2</sub>/CH<sub>4</sub>) Capture.

Abhishek Bag <sup>a,b</sup>, Gouri Sankar Roymahapatra <sup>b,\*</sup>

<sup>a</sup> Dept. of Basic Science and Humanities, Global Institute of Science and Technology, ICARE Complex, Haldia 721657, WB, India

<sup>b</sup> School of Applied Sciences and Humanities, Haldia Institute of Technology, ICARE Complex, Haldia 721657, WB, India

\*Corresponding email: [grm.chem@gmail.com](mailto:grm.chem@gmail.com); [grm.chem@hithaldia.in](mailto:grm.chem@hithaldia.in)

#### Imidazole- Cu(I)@nCO<sub>2</sub> systems

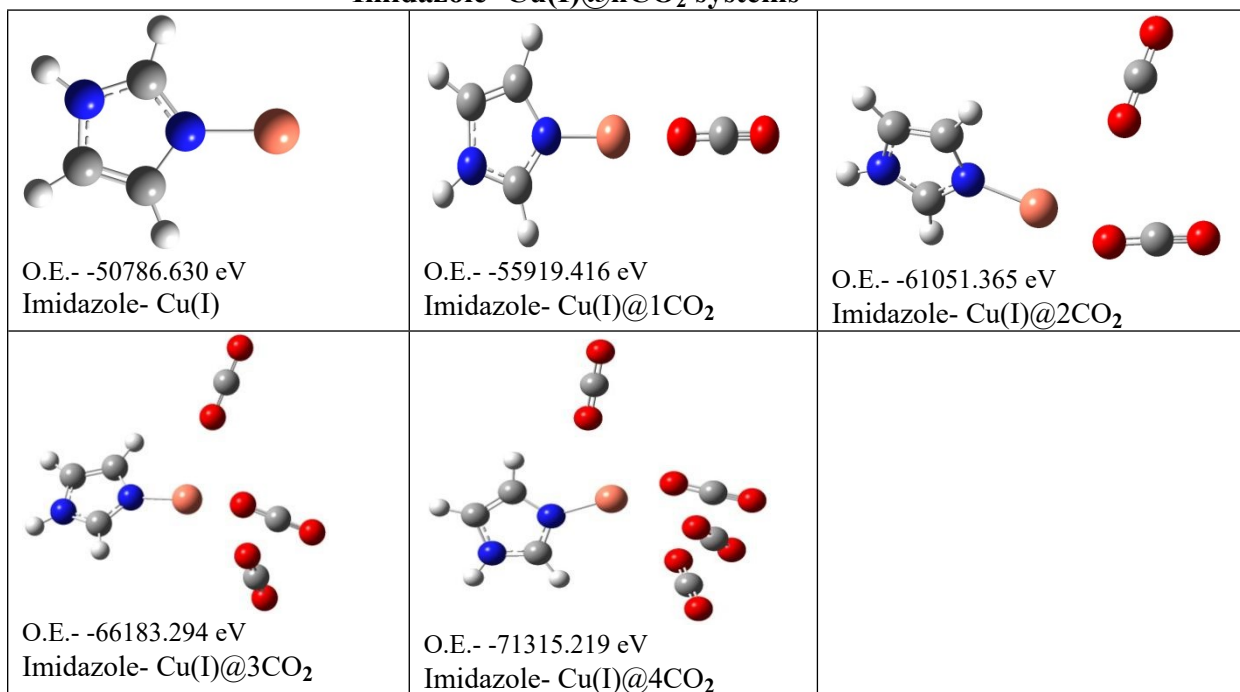

### Imidazole- Cu(I)@nCO systems

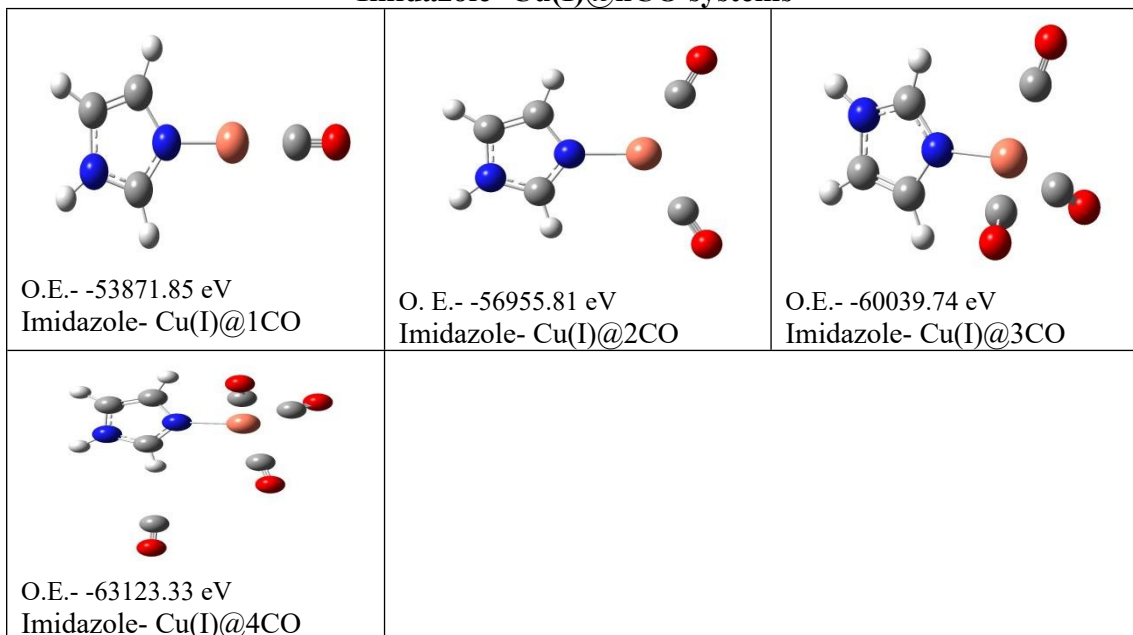

### Imidazole- Cu(I)@nCH<sub>4</sub> systems

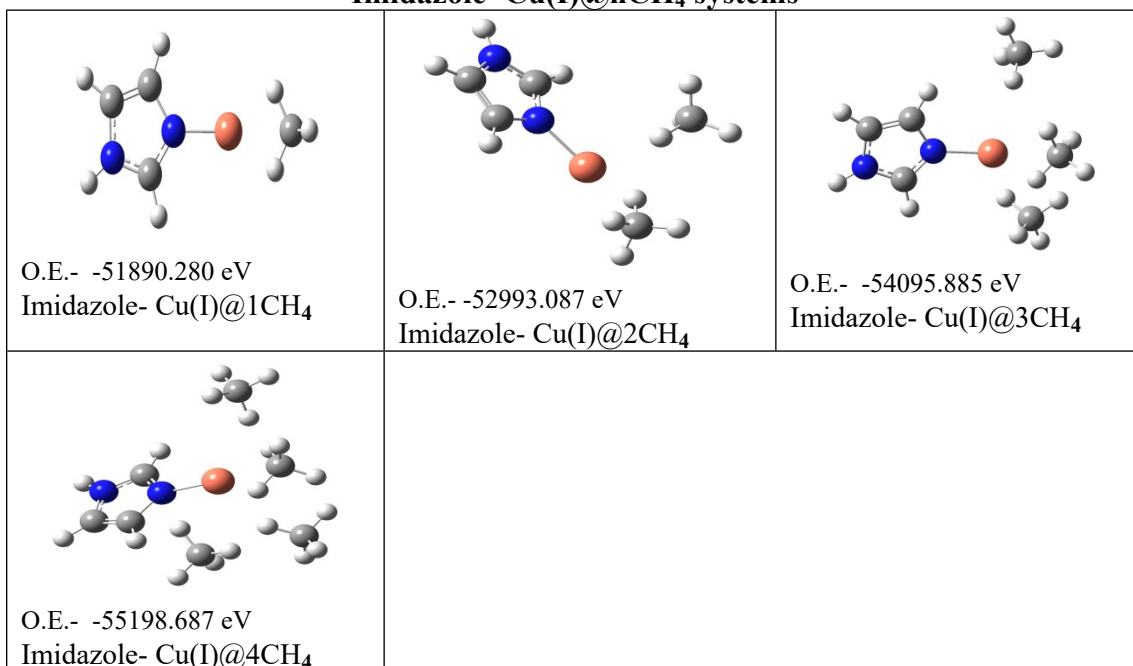

### Isoxazole-Cu(I) $@n\text{CO}_2$ systems

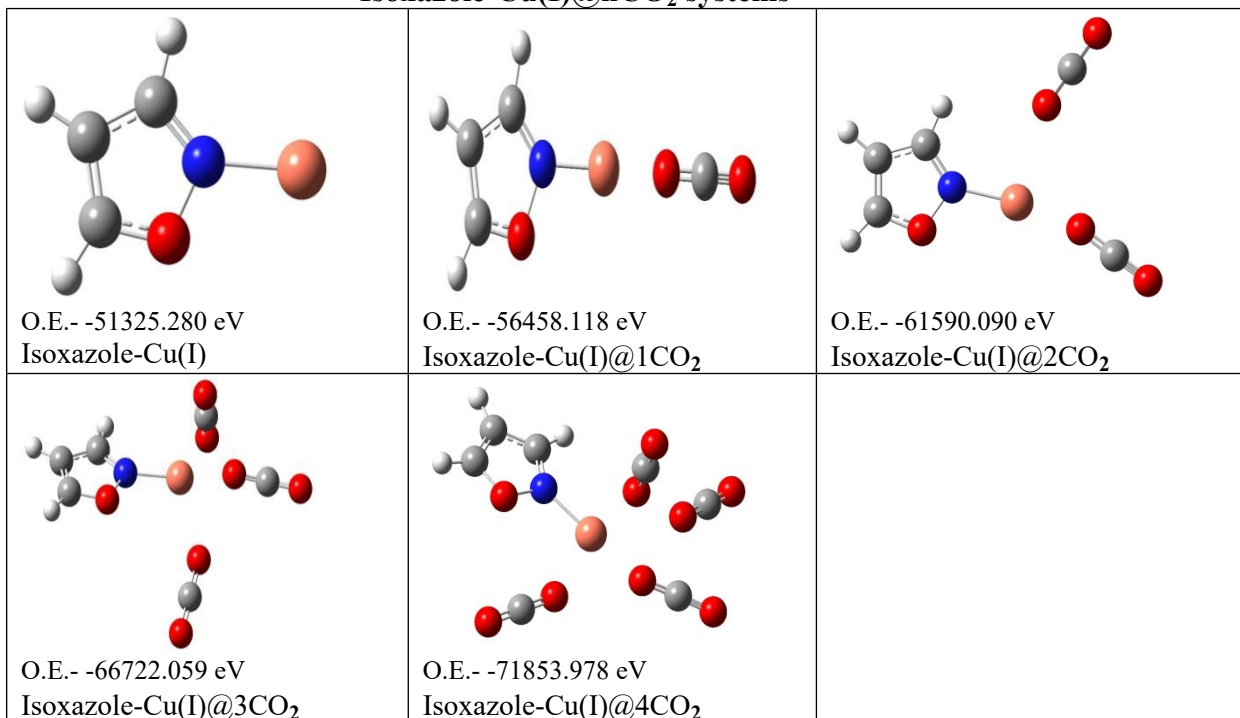

### Isoxazole-Cu(I) $@n\text{CO}$ systems

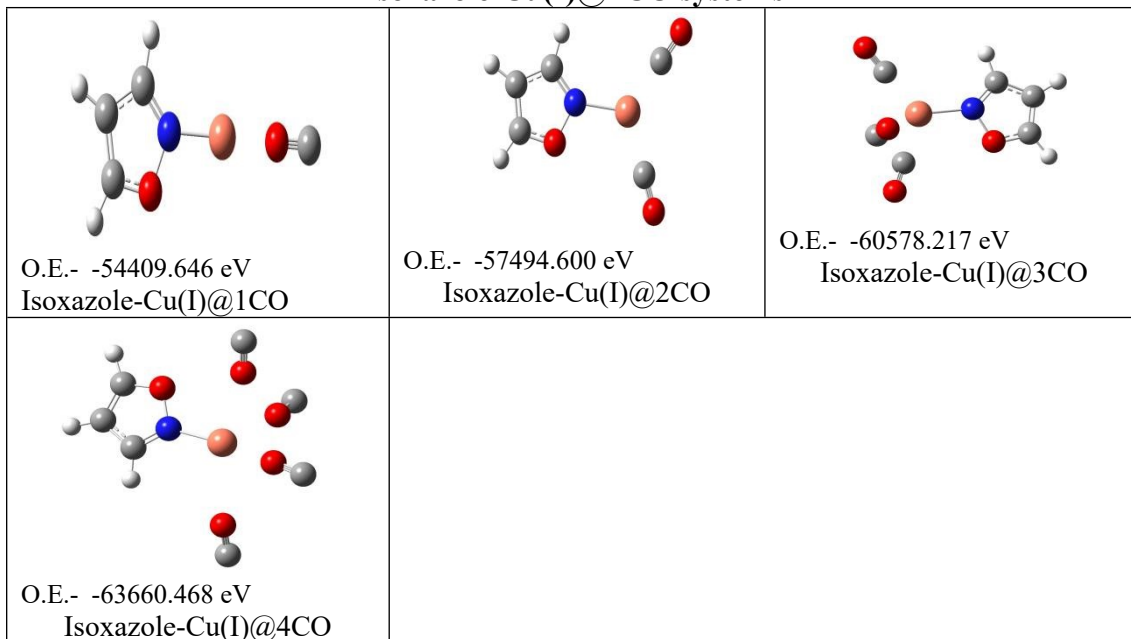

### Isoxazole -Cu(I)@nCH<sub>4</sub> systems

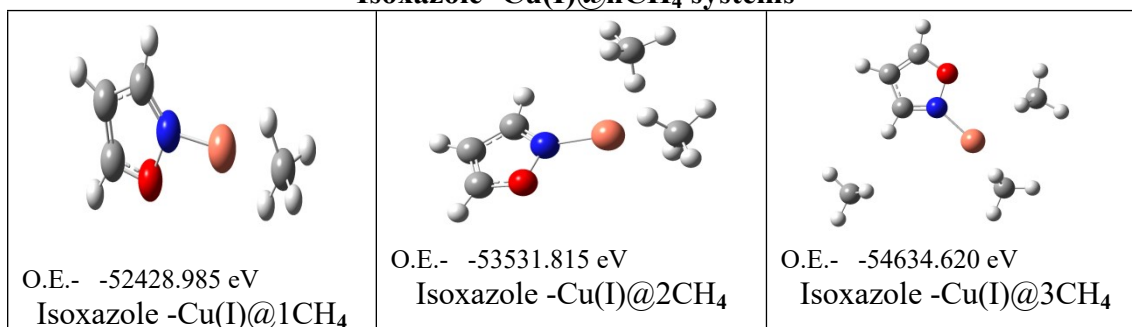

### Isothiazole-Cu(I)@nCO<sub>2</sub> systems

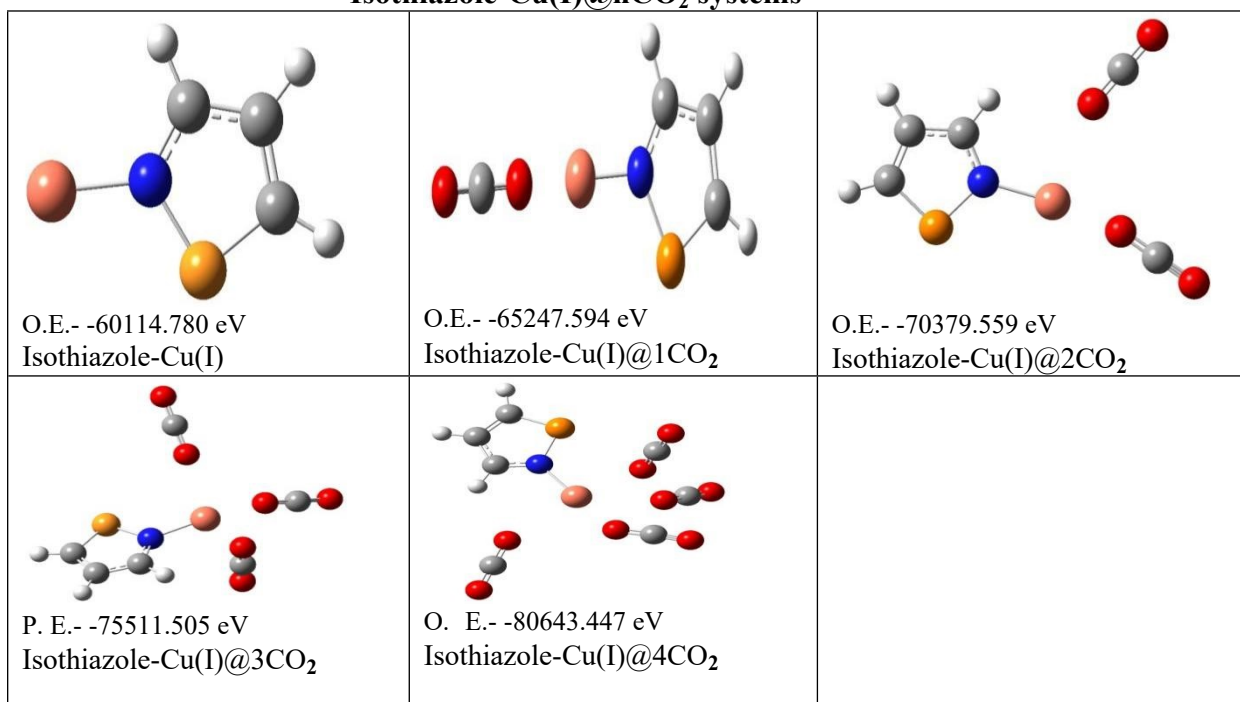

### Isothiazole-Cu(I)@nCO systems

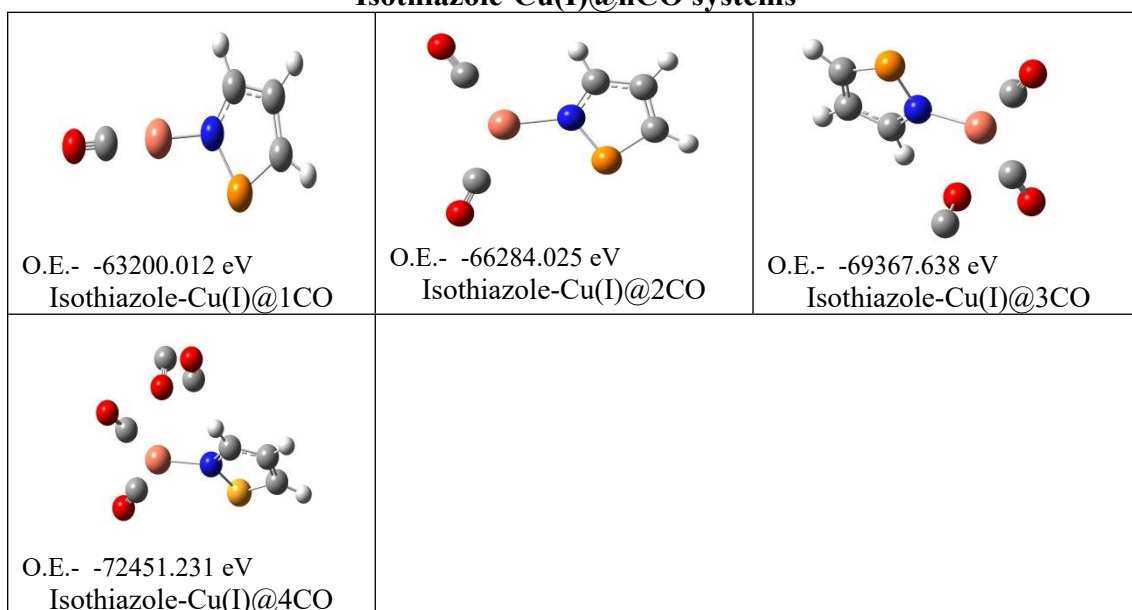

### Isothiazole-Cu(I)@nCH<sub>4</sub> systems

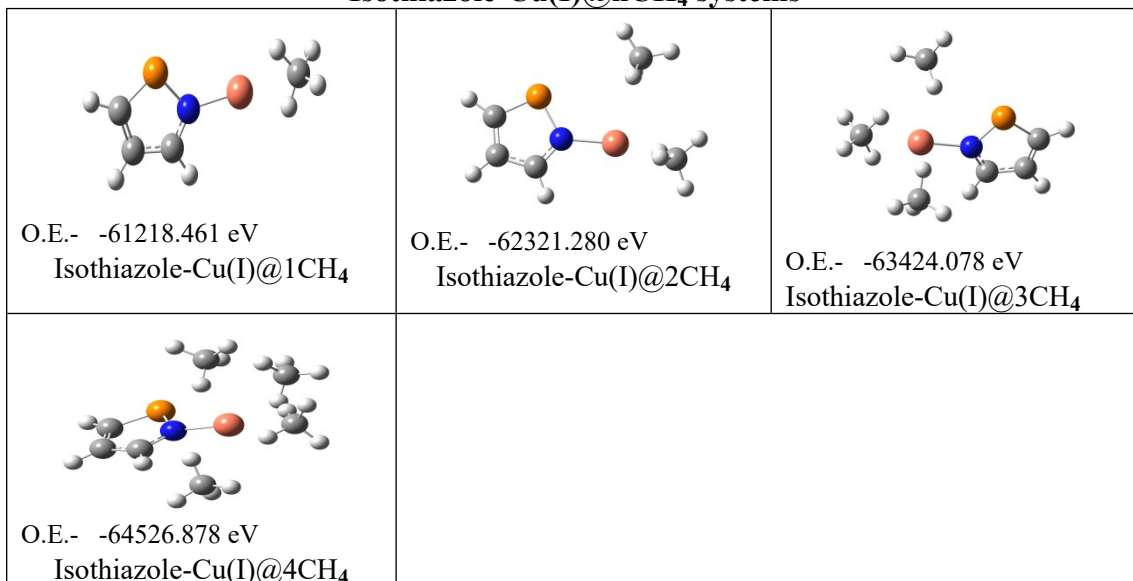

### Oxazole-N-Cu(I)@nCO<sub>2</sub> systems

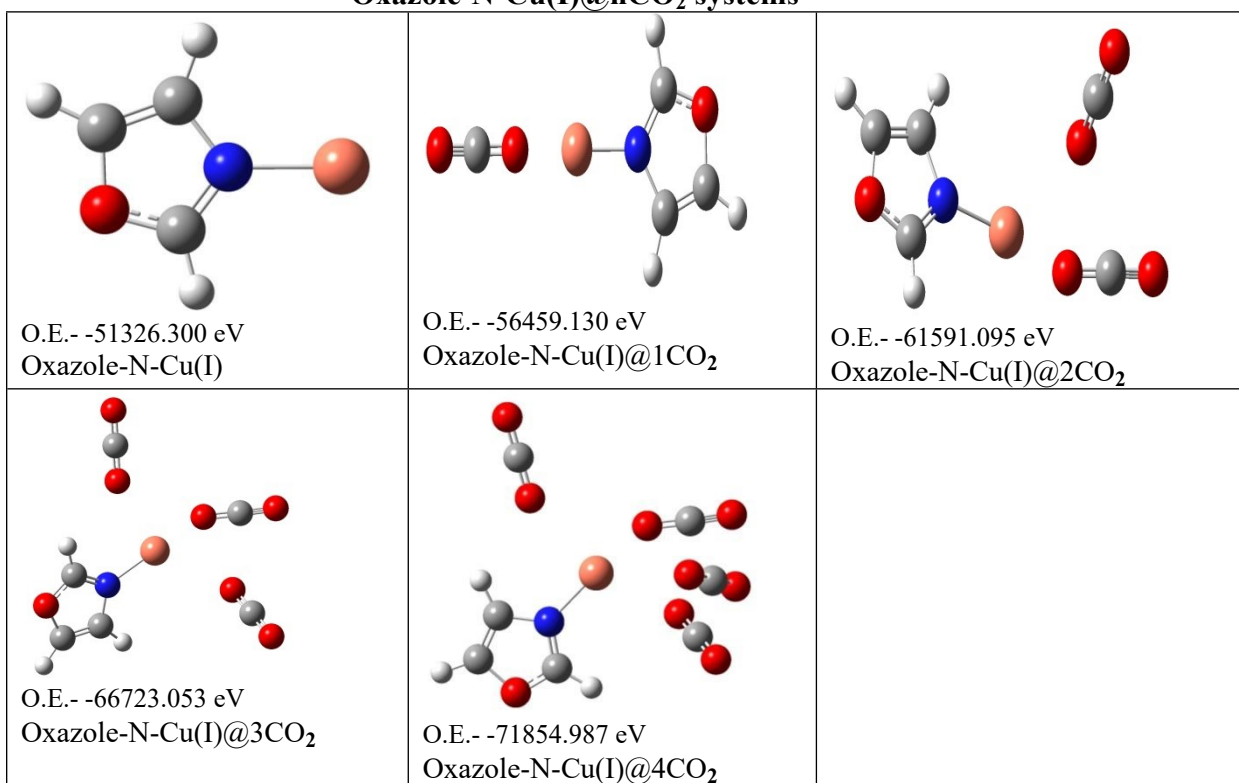

### Oxazole-N-Cu(I)@nCO systems

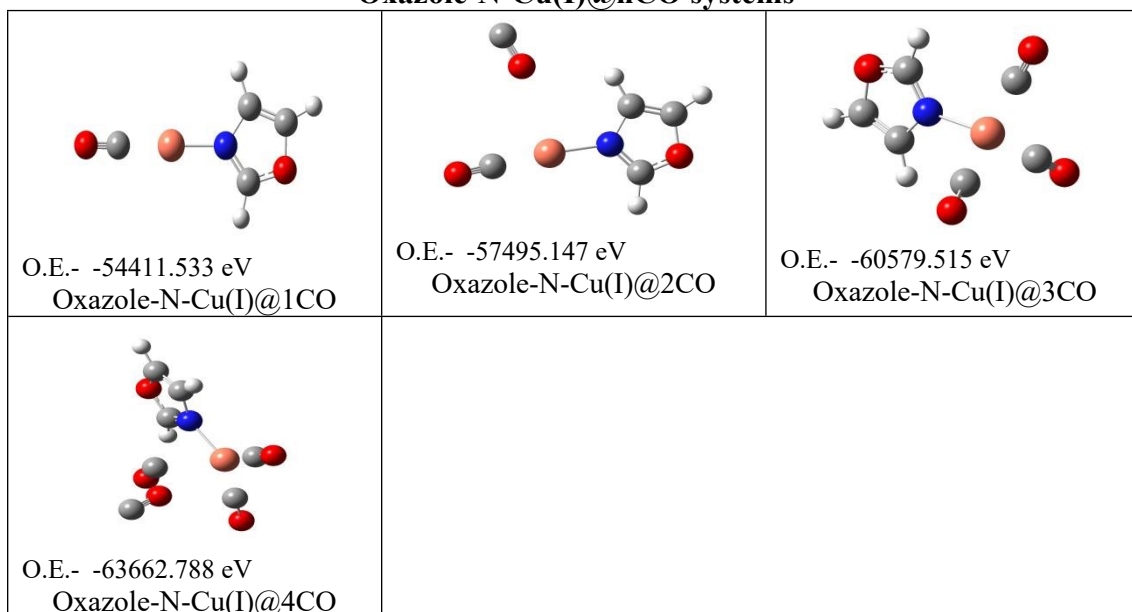

### Oxazole-N-Cu(I)@nCH<sub>4</sub> systems

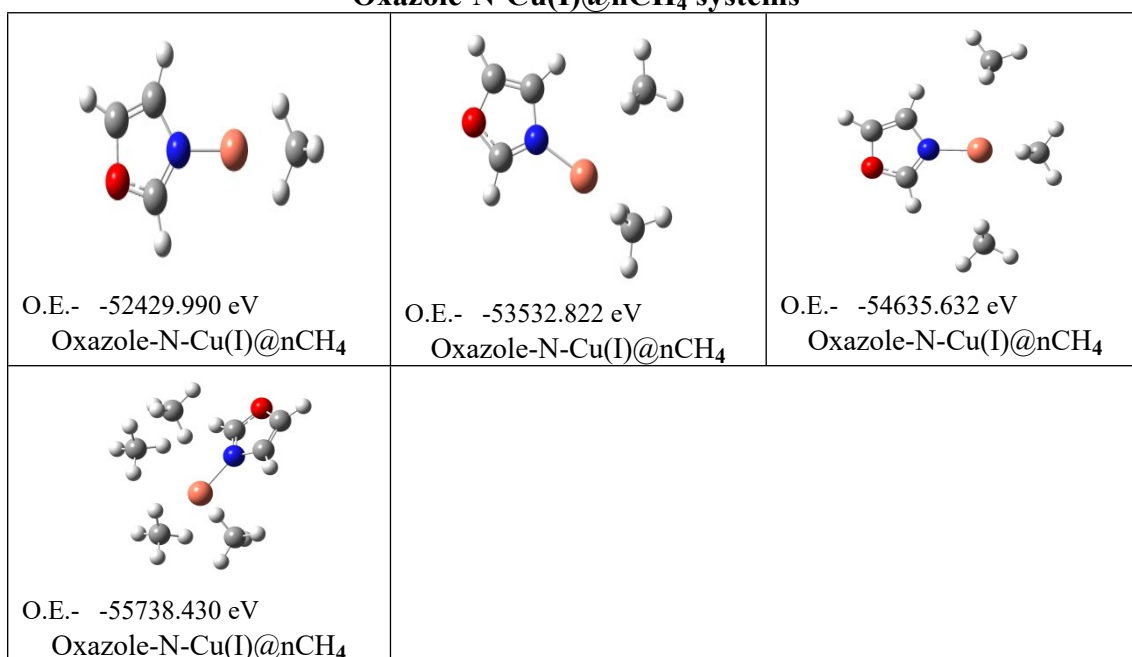

### Oxazole-O-Cu(I) $@n$ CO<sub>2</sub> systems

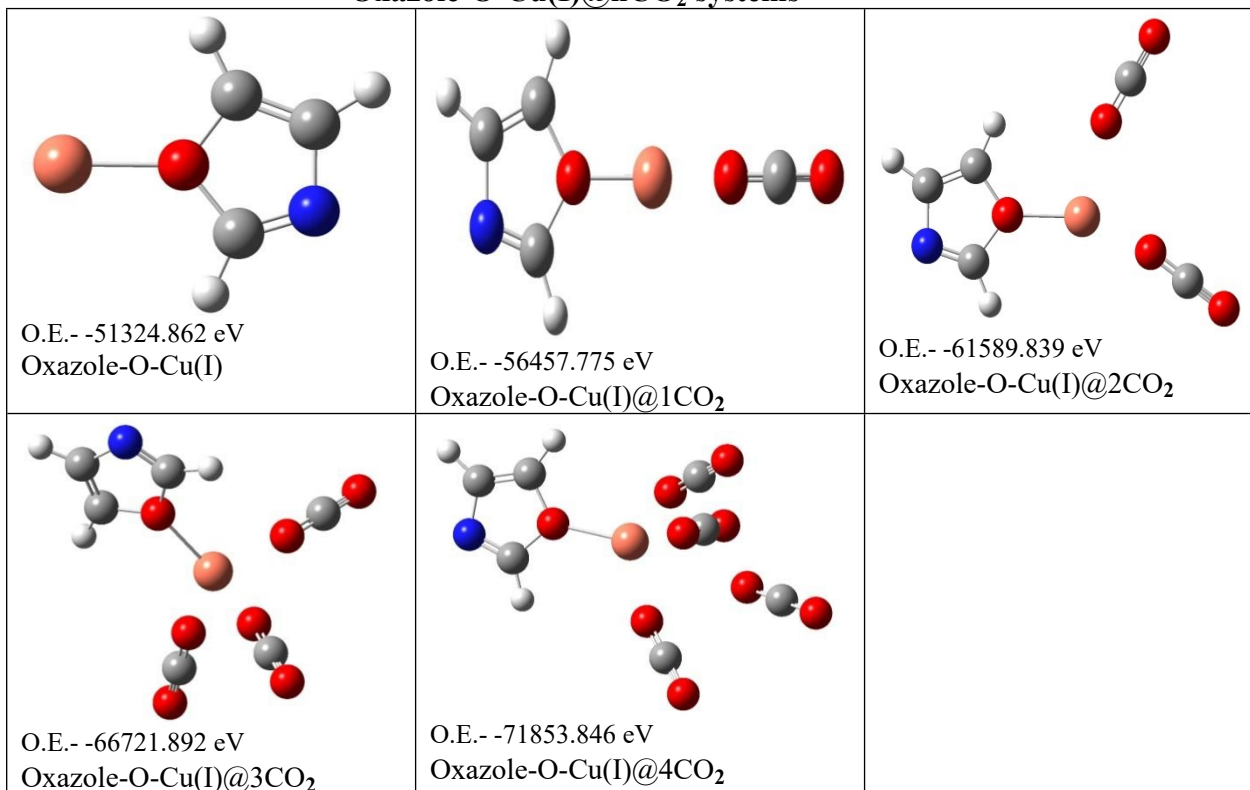

### Oxazole-O-Cu(I) $@n$ CO systems

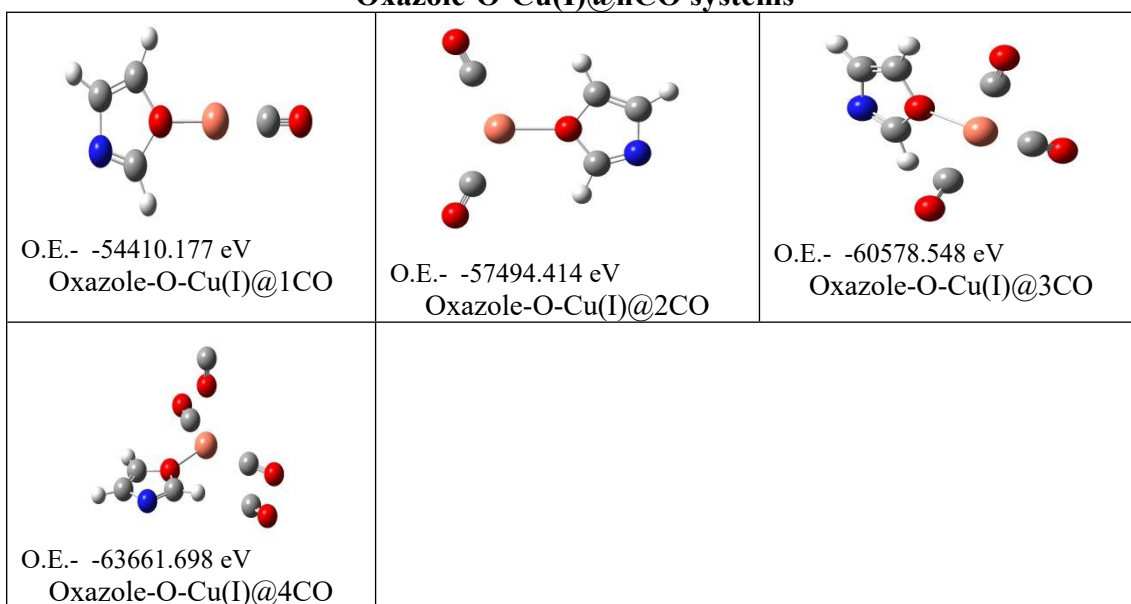

### Oxazole-O-Cu(I)@nCH<sub>4</sub> systems

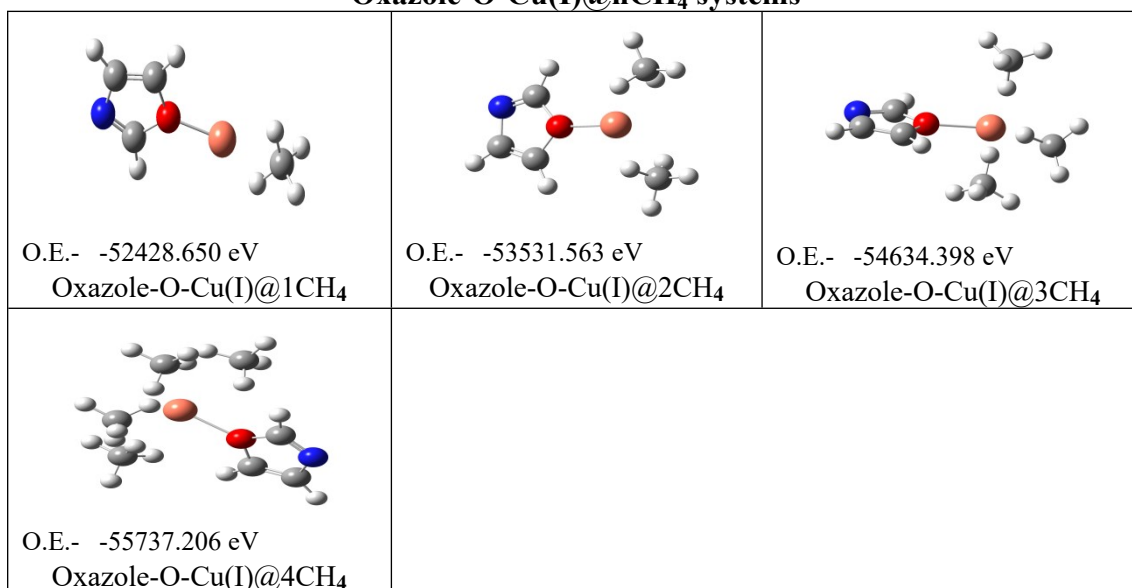

### Pyrazole-Cu(I)@nCO<sub>2</sub> systems

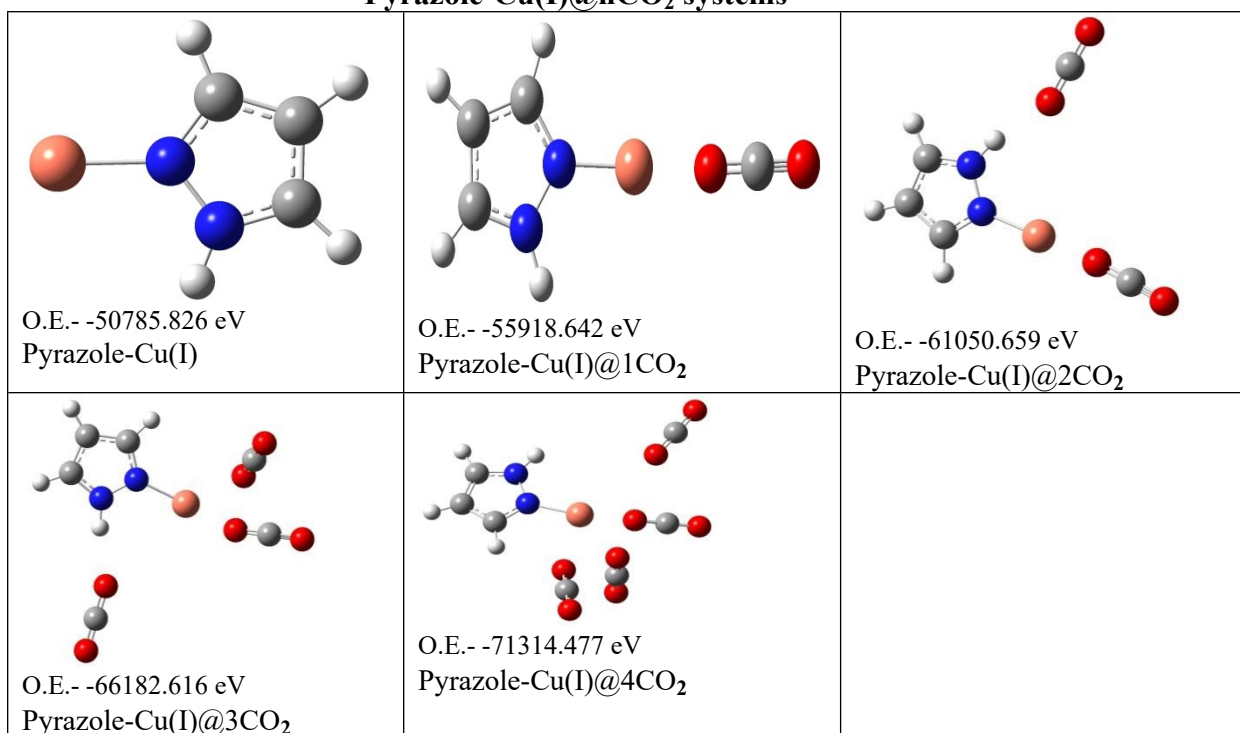

### Pyrazole-Cu(I)*@n*CO systems

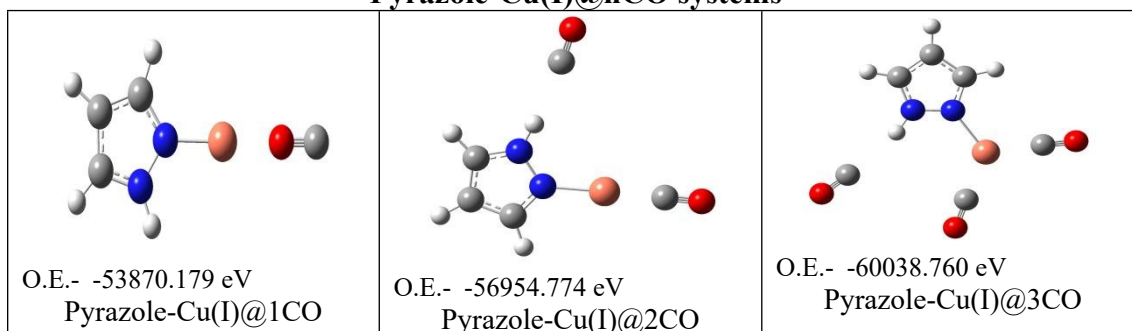

### Pyrazole-Cu(I)*@n*CH<sub>4</sub> systems

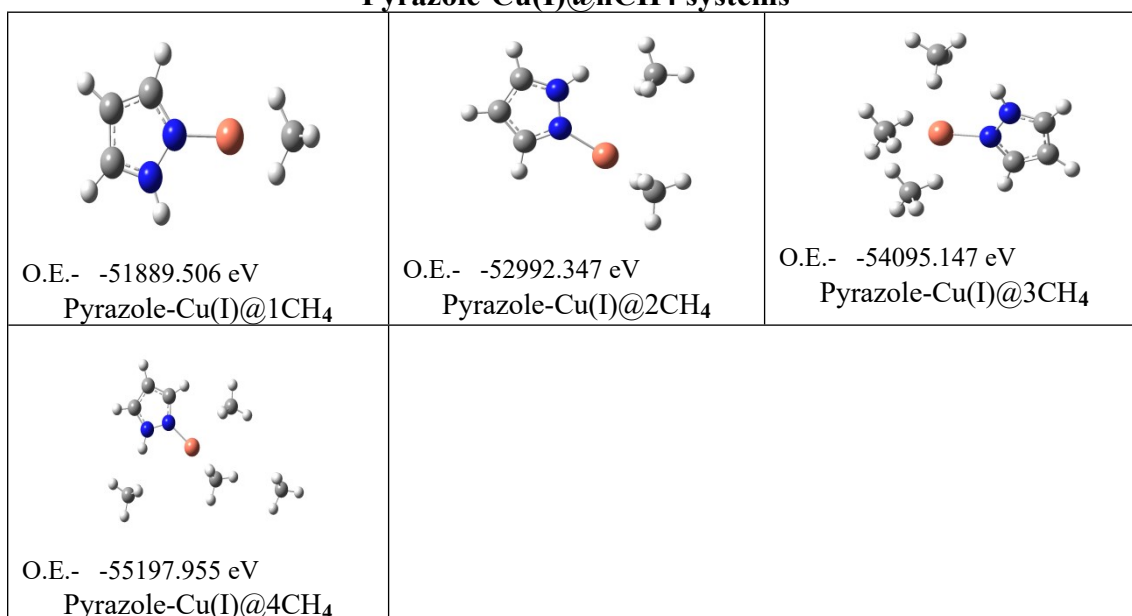

### Thiazole-Cu(I)*@n*CO<sub>2</sub> systems

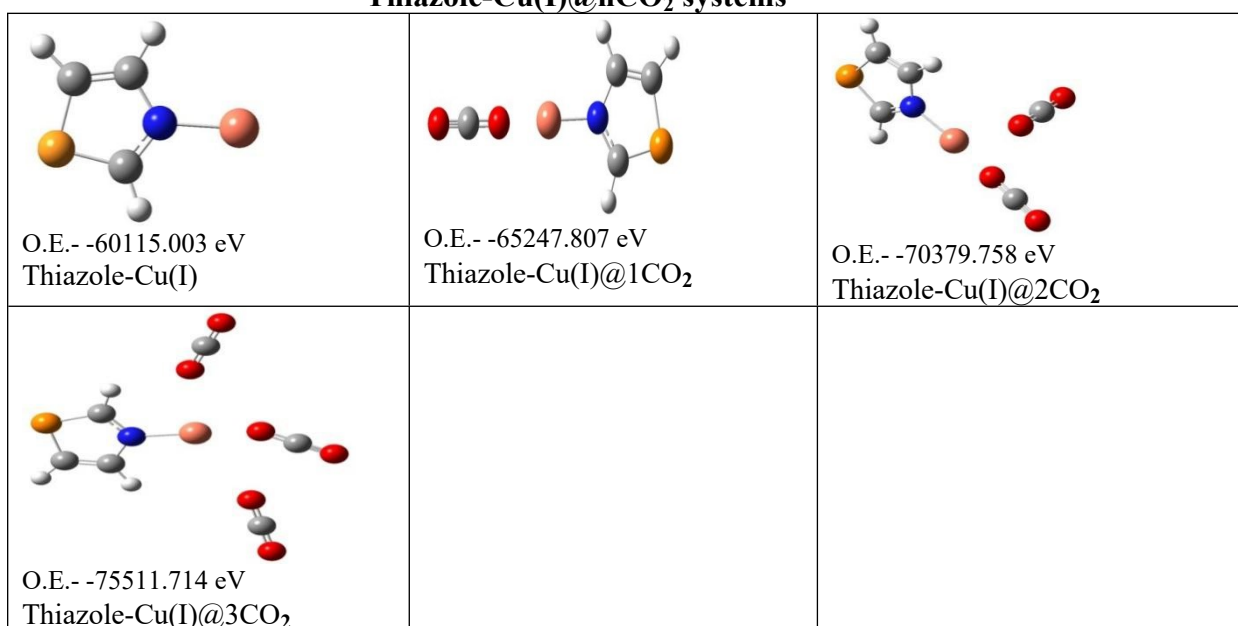

### Thiazole-Cu(I)*@n*CO systems

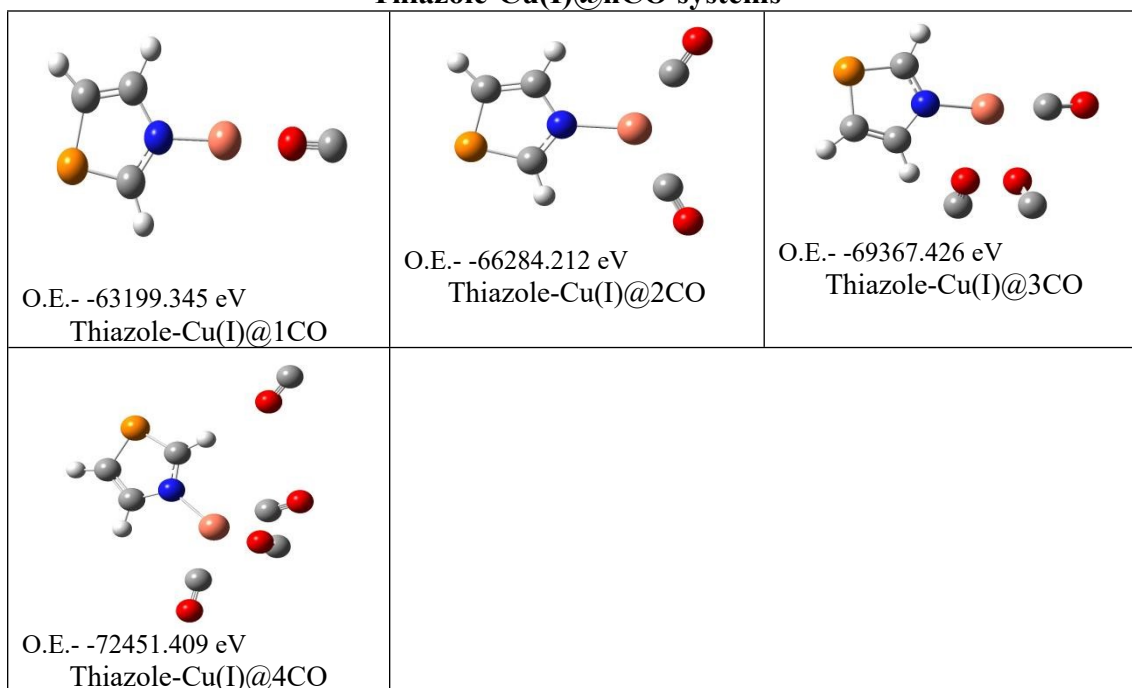

### Thiazole-Cu(I)*@n*CH<sub>4</sub> systems

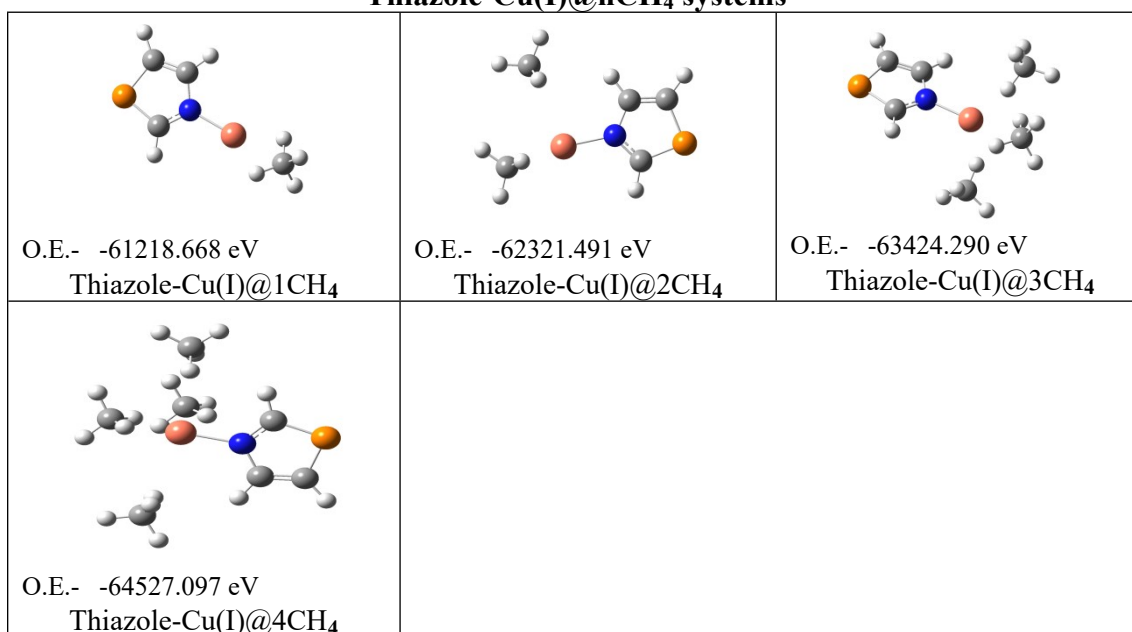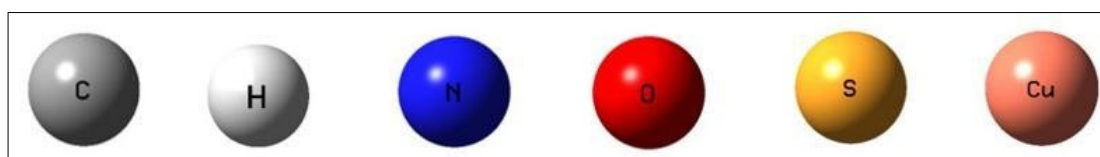

**Fig. SF1:** Optimized geometries and energy of Cu(I) decorated and gradual GHGs adsorb different aromatic five-membered heterocyclic systems decorated with Cu(I) at B3LYP/6-31+g (d, p) level of theory.

**Table ST1:** Electrophilicity ( $\omega$ ) and ( $eV$ ), Hardness ( $\eta$ ); ( $eV$ ) of gradual GHGs adsorb different model systems decorated with Cu(I) at B3LYP/6-31+g (d, p) level of theory.

**Imidazole system**

| System           | Electrophilicity | System                        | Electrophilicity | System                        | Electrophilicity |
|------------------|------------------|-------------------------------|------------------|-------------------------------|------------------|
| Imidazole-Cu     | 11.224           | Imidazole-Cu                  | 11.224           | Imidazole-Cu                  | 11.224           |
| Imidazole-Cu@1CO | 8.489            | Imidazole-Cu@1CO <sub>2</sub> | 5.594            | Imidazole-Cu@1CH <sub>4</sub> | 5.068            |
| Imidazole-Cu@2CO | 9.142            | Imidazole-Cu@2CO <sub>2</sub> | 5.259            | Imidazole-Cu@2CH <sub>4</sub> | 4.834            |
| Imidazole-Cu@3CO | 7.561            | Imidazole-Cu@3CO <sub>2</sub> | 4.977            | Imidazole-Cu@3CH <sub>4</sub> | 4.716            |
| Imidazole-Cu@4CO | 7.489            | Imidazole-Cu@4CO <sub>2</sub> | 4.771            | Imidazole-Cu@4CH <sub>4</sub> | 4.576            |

**Isoxazole System**

| System           | Electrophilicity | System                        | Electrophilicity | System                        | Electrophilicity |
|------------------|------------------|-------------------------------|------------------|-------------------------------|------------------|
| Isoxazole-Cu     | 11.137           | Isoxazole-Cu                  | 11.137           | Isoxazole-Cu                  | 11.137           |
| Isoxazole-Cu@1CO | 7.103            | Isoxazole-Cu@1CO <sub>2</sub> | 6.351            | Isoxazole-Cu@1CH <sub>4</sub> | 6.399            |
| Isoxazole-Cu@2CO | 8.759            | Isoxazole-Cu@2CO <sub>2</sub> | 6.070            | Isoxazole-Cu@2CH <sub>4</sub> | 6.214            |
| Isoxazole-Cu@3CO | 8.141            | Isoxazole-Cu@3CO <sub>2</sub> | 6.047            | Isoxazole-Cu@3CH <sub>4</sub> | 6.104            |
| Isoxazole-Cu@4CO | 6.495            | isoxazoleCu4CO <sub>2</sub>   | 5.997            |                               |                  |

**Isothiazole System**

| System             | Electrophilicity | System                          | Electrophilicity | System                          | Electrophilicity |
|--------------------|------------------|---------------------------------|------------------|---------------------------------|------------------|
| Isothiazole-Cu     | 11.260           | Isothiazole-Cu                  | 11.260           | Isothiazole-Cu                  | 11.260           |
| Isothiazole-Cu@1CO | 8.437            | Isothiazole-Cu@1CO <sub>2</sub> | 6.720            | Isothiazole-Cu@1CH <sub>4</sub> | 6.779            |
| Isothiazole-Cu@2CO | 8.992            | Isothiazole-Cu2@CO <sub>2</sub> | 6.421            | Isothiazole-Cu@2CH <sub>4</sub> | 6.595            |
| Isothiazole-Cu@3CO | 8.354            | Isothiazole-Cu@3CO <sub>2</sub> | 6.431            | Isothiazole-Cu@3CH <sub>4</sub> | 6.500            |
| Isothiazole-Cu@4CO | 8.290            | Isothiazole-Cu4@CO <sub>2</sub> | 6.299            | Isothiazole-Cu@4CH <sub>4</sub> | 6.422            |

### Pyrazole System

| System          | Electrophilicity | System                       | Electrophilicity | System                       | Electrophilicity |
|-----------------|------------------|------------------------------|------------------|------------------------------|------------------|
| Pyrazole-Cu     | 11.655           | Pyrazole-Cu                  | 11.655           | Pyrazole-Cu                  | 11.655           |
| Pyrazole-Cu@1CO | 7.216            | Pyrazole-Cu@1CO <sub>2</sub> | 5.888            | Pyrazole-Cu@1CH <sub>4</sub> | 5.400            |
| Pyrazole-Cu@2CO | 8.628            | Pyrazole-Cu@2CO <sub>2</sub> | 5.673            | Pyrazole-Cu@2CH <sub>4</sub> | 5.083            |
| Pyrazole-Cu@3CO | 9.179            | Pyrazole-Cu@3CO <sub>2</sub> | 5.344            | Pyrazole-Cu@3CH <sub>4</sub> | 4.940            |
| Pyrazole-Cu@4CO | -----            | Pyrazole-Cu@4CO <sub>2</sub> | 4.993            | Pyrazole-Cu@4CH <sub>4</sub> | 4.919            |

### Thiazole System

| System          | Electrophilicity | System                       | Electrophilicity | System                       | Electrophilicity |
|-----------------|------------------|------------------------------|------------------|------------------------------|------------------|
| Thiazole-Cu     | 11.655           | Thiazole-Cu                  | 11.421           | Thiazole-Cu                  | 11.421           |
| Thiazole-Cu@1CO | 7.163            | Thiazole-Cu@1CO <sub>2</sub> | 6.231            | Thiazole-Cu@1CH <sub>4</sub> | 6.289            |
| Thiazole-Cu@2CO | 9.281            | Thiazole-Cu@2CO <sub>2</sub> | 5.996            | Thiazole-Cu@2CH <sub>4</sub> | 6.127            |
| Thiazole-Cu@3CO | 7.819            | Thiazole-Cu@3CO <sub>2</sub> | 5.815            | Thiazole-Cu@3CH <sub>4</sub> | 6.033            |
| Thiazole-Cu@4CO | 8.508            | Thiazole-Cu@4CO <sub>2</sub> | -----            | Thiazole-Cu@4CH <sub>4</sub> | 5.968            |

### Oxazole-O System

| System             | Electrophilicity | System                           | Electrophilicity | System                         | Electrophilicity |
|--------------------|------------------|----------------------------------|------------------|--------------------------------|------------------|
| Oxazole-O-Cu       | 17.036           | Oxazole-O-Cu                     | 17.036           | Oxazole-O-Cu                   | 17.036           |
| Oxazole-O-Cu @1CO  | 10.254           | Oxazole-O-Cu @1CO <sub>2</sub>   | 7.738            | Oxazole-O-Cu @1CH <sub>4</sub> | 7.284            |
| Oxazole-O-Cu @2CO  | 11.545           | Oxazole-O-Cu @2CO <sub>2</sub>   | 6.876            | Oxazole-O-Cu @2CH <sub>4</sub> | 6.470            |
| Oxazole-O-Cu @3CO  | 10.835           | Oxazole-O-Cu @3CO <sub>2</sub>   | 6.051            | Oxazole-O-Cu @3CH <sub>4</sub> | 6.141            |
| Oxazole-O-Cu @4 CO | 10.162           | Oxazole-O-Cu @ 4 CO <sub>2</sub> | 5.864            | Oxazole-O-Cu @4CH <sub>4</sub> | 5.910            |

### Oxazole-N System

| System           | Electrophilicity | System                        | Electrophilicity | System                         | Electrophilicity |
|------------------|------------------|-------------------------------|------------------|--------------------------------|------------------|
| Oxazole-N-Cu     | 11.640           | Oxazole-N-Cu                  | 11.640           | Oxazole-N-Cu                   | 11.640           |
| Oxazole-N-Cu@1CO | 8.697            | Oxazole-N-Cu@1CO <sub>2</sub> | 5.911            | Oxazole-N-Cu @1CH <sub>4</sub> | 5.677            |
| Oxazole-N-Cu@2CO | 8.353            | Oxazole-N-Cu@2CO <sub>2</sub> | 5.536            | Oxazole-N-Cu @2CH <sub>4</sub> | 5.500            |
| Oxazole-N-Cu@3CO | 7.840            | Oxazole-N-Cu@3CO <sub>2</sub> | 5.304            | Oxazole-N-Cu @3CH <sub>4</sub> | 5.408            |
| Oxazole-N-Cu@4CO | 8.557            | Oxazole-N-Cu@4CO <sub>2</sub> | 5.147            | Oxazole-N-Cu @4CH <sub>4</sub> | 5.319            |

### Imidazole system

| System           | Hardness | System                        | Hardness | System                         | Hardness |
|------------------|----------|-------------------------------|----------|--------------------------------|----------|
| Imidazole-Cu     | 3.949    | Imidazole-Cu                  | 3.949    | Imidazole-Cu                   | 3.949    |
| Imidazole-Cu@1CO | 4.699    | Imidazole-Cu@1CO <sub>2</sub> | 5.870    | Imidazole-Cu@1CH <sub>4</sub>  | 6.248    |
| Imidazole-Cu@2CO | 4.308    | Imidazole-Cu@2CO <sub>2</sub> | 6.003    | Imidazole-Cu@2CH <sub>4</sub>  | 6.333    |
| Imidazole-Cu@3CO | 4.729    | Imidazole-Cu@3CO <sub>2</sub> | 6.057    | Imidazole-Cu@ 3CH <sub>4</sub> | 6.386    |
| Imidazole-Cu@4CO | 4.684    | Imidazole-Cu@4CO <sub>2</sub> | 6.128    | Imidazole-Cu@ 4CH <sub>4</sub> | 6.443    |

### Isoxazole System

| System           | Hardness | System                        | Hardness | System                         | Hardness |
|------------------|----------|-------------------------------|----------|--------------------------------|----------|
| Isoxazole-Cu     | 4.579    | Isoxazole-Cu                  | 4.579    | Isoxazole-Cu                   | 4.579    |
| Isoxazole-Cu@1CO | 5.936    | Isoxazole-Cu@1CO <sub>2</sub> | 6.167    | Isoxazole-Cu@ 1CH <sub>4</sub> | 6.235    |
| Isoxazole-Cu@2CO | 5.166    | Isoxazole-Cu@2CO <sub>2</sub> | 6.002    | Isoxazole-Cu@ 2CH <sub>4</sub> | 6.161    |
| Isoxazole-Cu@3CO | 5.340    | Isoxazole-Cu@3CO <sub>2</sub> | 5.658    | Isoxazole-Cu@ 3CH <sub>4</sub> | 6.165    |
| Isoxazole-Cu@4CO | 5.800    | Isoxazole-Cu@4CO <sub>2</sub> | 5.584    |                                |          |

### Isothiazole System

| System             | Hardness | System                          | Hardness | System                          | Hardness |
|--------------------|----------|---------------------------------|----------|---------------------------------|----------|
| Isothiazole-Cu     | 4.332    | Isothiazole-Cu                  | 4.332    | Isothiazole-Cu                  | 4.332    |
| Isothiazole-Cu@1CO | 5.189    | Isothiazole-Cu@1CO <sub>2</sub> | 5.758    | Isothiazole-Cu@1CH <sub>4</sub> | 5.778    |
| Isothiazole-Cu@2CO | 4.811    | Isothiazole-Cu@2CO <sub>2</sub> | 5.726    | Isothiazole-Cu@2CH <sub>4</sub> | 5.763    |
| Isothiazole-Cu@3CO | 4.990    | Isothiazole-Cu@3CO <sub>2</sub> | 5.501    | Isothiazole-Cu@3CH <sub>4</sub> | 5.781    |
| Isothiazole-Cu@4CO | 4.950    | Isothiazole-Cu@4CO <sub>2</sub> | 5.446    | Isothiazole-Cu@4CH <sub>4</sub> | 5.781    |

### Pyrazole System

| System          | Hardness | System                       | Hardness | System                       | Hardness |
|-----------------|----------|------------------------------|----------|------------------------------|----------|
| Pyrazole-Cu     | 4.086    | Pyrazole-Cu                  | 4.086    | Pyrazole-Cu                  | 4.086    |
| Pyrazole-Cu@1CO | 5.437    | Pyrazole-Cu@1CO <sub>2</sub> | 6.000    | Pyrazole-Cu@1CH <sub>4</sub> | 6.373    |
| Pyrazole-Cu@2CO | 4.831    | Pyrazole-Cu@2CO <sub>2</sub> | 5.938    | Pyrazole-Cu@2CH <sub>4</sub> | 6.456    |
| Pyrazole-Cu@3CO | 4.487    | Pyrazole-Cu@3CO <sub>2</sub> | 6.040    | Pyrazole-Cu@3CH <sub>4</sub> | 6.511    |
| Pyrazole-Cu@4CO | -----    | Pyrazole-Cu@4CO <sub>2</sub> | 6.198    | Pyrazole-Cu@4CH <sub>4</sub> | 6.464    |

### Thiazole System

| System          | Hardness | System                       | Hardness | System                       | Hardness |
|-----------------|----------|------------------------------|----------|------------------------------|----------|
| Thiazole-Cu     | 4.086    | Thiazole-Cu                  | 4.169    | Thiazole-Cu                  | 4.169    |
| Thiazole-Cu@1CO | 5.499    | Thiazole-Cu@1CO <sub>2</sub> | 5.878    | Thiazole-Cu@1CH <sub>4</sub> | 5.876    |
| Thiazole-Cu@2CO | 4.551    | Thiazole-Cu@2CO <sub>2</sub> | 5.902    | Thiazole-Cu@2CH <sub>4</sub> | 5.879    |
| Thiazole-Cu@3CO | 5.148    | Thiazole-Cu@3CO <sub>2</sub> | 5.879    | Thiazole-Cu@3CH <sub>4</sub> | 5.889    |
| Thiazole-Cu@4CO | 4.713    | Thiazole-Cu@4CO <sub>2</sub> | -----    | Thiazole-Cu@4CH <sub>4</sub> | 5.888    |

### Oxazole-O System

| System           | Hardness | System                        | Hardness | System                        | Hardness |
|------------------|----------|-------------------------------|----------|-------------------------------|----------|
| Oxazole-O-Cu     | 3.159    | Oxazole-O-Cu                  | 3.159    | Oxazole-O-Cu                  | 3.159    |
| Oxazole-O-Cu@1CO | 4.493    | Oxazole-O-Cu@1CO <sub>2</sub> | 5.237    | Oxazole-O-Cu@1CH <sub>4</sub> | 5.461    |
| Oxazole-O-Cu@2CO | 3.894    | Oxazole-O-Cu@2CO <sub>2</sub> | 5.390    | Oxazole-O-Cu@2CH <sub>4</sub> | 5.582    |
| Oxazole-O-Cu@3CO | 3.880    | Oxazole-O-Cu@3CO <sub>2</sub> | 5.583    | Oxazole-O-Cu@3CH <sub>4</sub> | 5.682    |
| Oxazole-O-Cu@4CO | 4.113    | Oxazole-O-Cu@4CO <sub>2</sub> | 5.609    | Oxazole-O-Cu@4CH <sub>4</sub> | 5.787    |

### Oxazole-N System

| System           | Hardness | System                        | Hardness | System                        | Hardness |
|------------------|----------|-------------------------------|----------|-------------------------------|----------|
| Oxazole-O-Cu     | 4.272    | Oxazole-N-Cu                  | 4.272    | Oxazole-N-Cu                  | 4.272    |
| Oxazole-O-Cu@1CO | 5.113    | Oxazole-N-Cu@1CO <sub>2</sub> | 6.264    | Oxazole-N-Cu@1CH <sub>4</sub> | 6.454    |
| Oxazole-O-Cu@2CO | 5.170    | Oxazole-N-Cu@2CO <sub>2</sub> | 6.397    | Oxazole-N-Cu@2CH <sub>4</sub> | 6.455    |
| Oxazole-O-Cu@3CO | 5.096    | Oxazole-N-Cu@3CO <sub>2</sub> | 6.312    | Oxazole-N-Cu@3CH <sub>4</sub> | 6.456    |
| Oxazole-O-Cu@4CO | 4.826    | Oxazole-N-Cu@4CO <sub>2</sub> | 6.249    | Oxazole-N-Cu@4CH <sub>4</sub> | 6.475    |

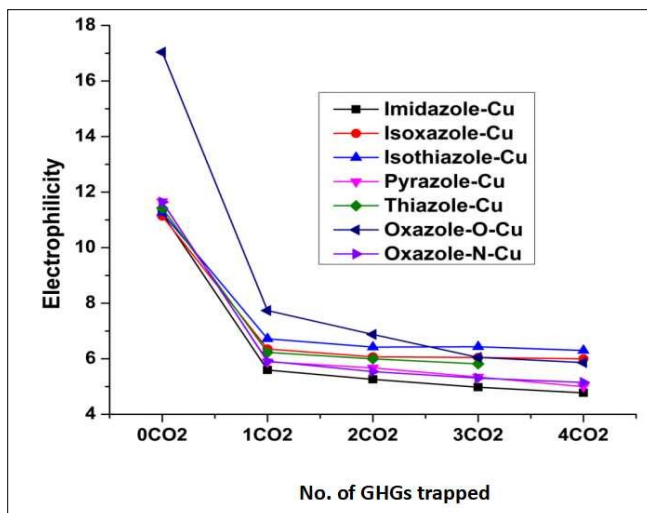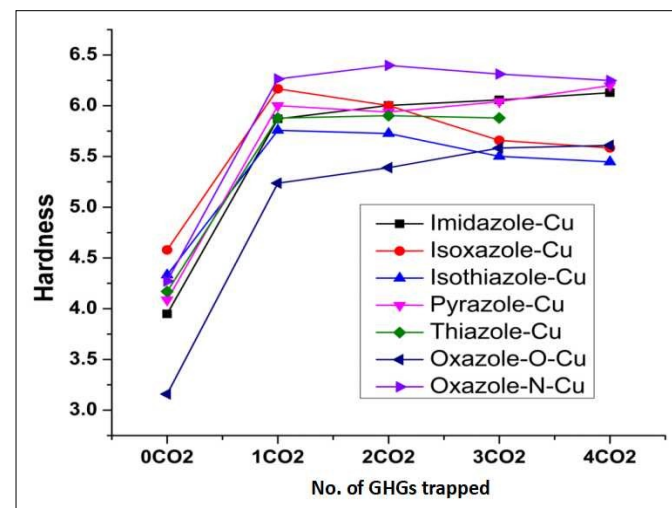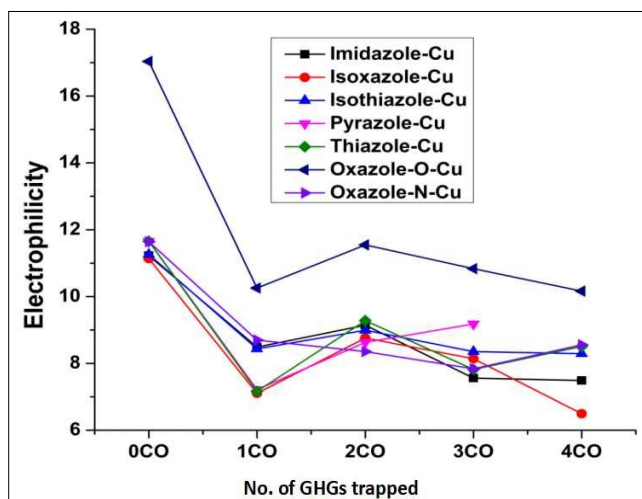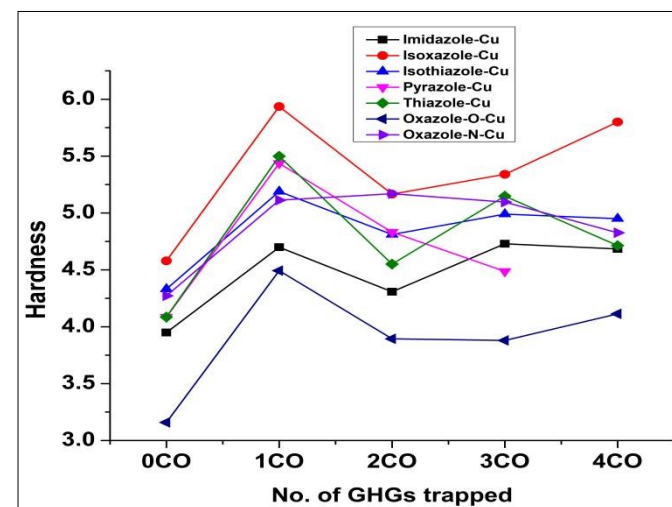

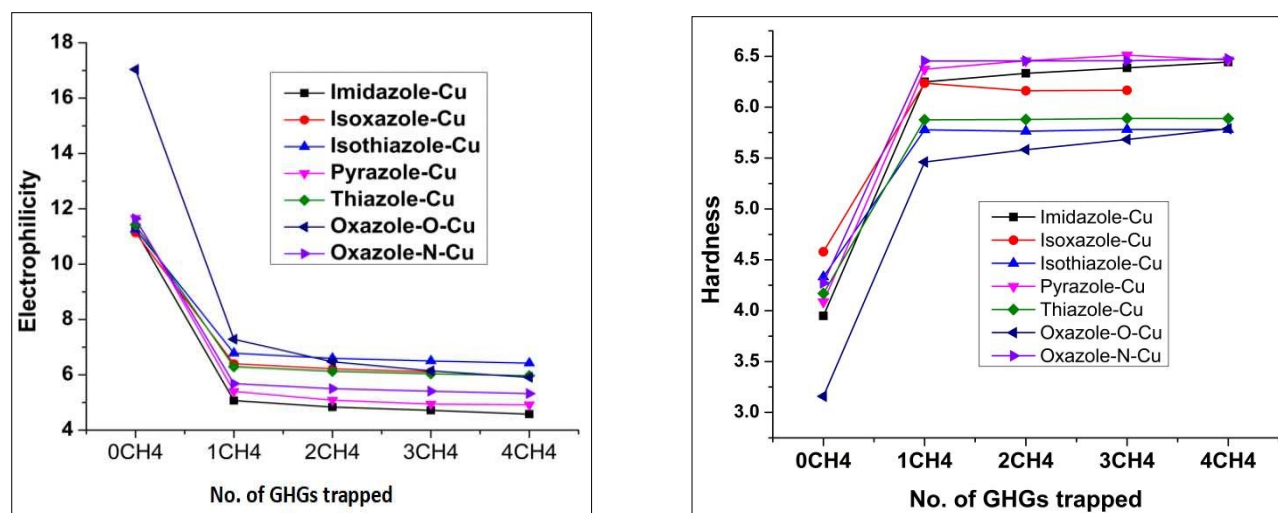

**Fig. SF2:** Graphical representation of Electrophilicity ( $\omega$ ) and  $(eV)$ , Hardness ( $\eta$ );  $(eV)$  of gradual GHGs adsorbed different aromatic five-membered heterocyclic systems decorated with Cu(I) at B3LYP/6–31+g (d, p) level of theory.

**Table ST2:** Average Adsorption energy values of gradual GHGs adsorb different model systems decorated with Cu(I) at B3LYP/6–31+g (d, p) level of theory.

#### Imidazole system

| System           | Adv. Adsorption Energy | System                        | Adv. Adsorption Energy | System                        | Adv. Adsorption Energy |
|------------------|------------------------|-------------------------------|------------------------|-------------------------------|------------------------|
| Imidazole-Cu@1CO | 1.698                  | Imidazole-Cu@1CO <sub>2</sub> | 0.977                  | Imidazole-Cu@1CH <sub>4</sub> | 0.876                  |
| Imidazole-Cu@2CO | 1.071                  | Imidazole-Cu@2CO <sub>2</sub> | 0.559                  | Imidazole-Cu@2CH <sub>4</sub> | 0.455                  |
| Imidazole-Cu@3CO | 0.848                  | Imidazole-Cu@3CO <sub>2</sub> | 0.413                  | Imidazole-Cu@3CH <sub>4</sub> | 0.312                  |

|                         |       |                                     |       |                                     |       |
|-------------------------|-------|-------------------------------------|-------|-------------------------------------|-------|
| <b>Imidazole-Cu@4CO</b> | 0.654 | <b>Imidazole-Cu@4CO<sub>2</sub></b> | 0.339 | <b>Imidazole-Cu@4CH<sub>4</sub></b> | 0.241 |
|-------------------------|-------|-------------------------------------|-------|-------------------------------------|-------|

| <b>System</b>           | <b>Adv. Adsorption Energy</b> | <b>System</b>                       | <b>Adv. Adsorption Energy</b> | <b>System</b>                       | <b>Adv. Adsorption Energy</b> |
|-------------------------|-------------------------------|-------------------------------------|-------------------------------|-------------------------------------|-------------------------------|
| <b>Isoxazole-Cu@1CO</b> | 0.842                         | <b>Isoxazole-Cu@1CO<sub>2</sub></b> | 1.028                         | <b>Isoxazole-Cu@1CH<sub>4</sub></b> | 0.931                         |
| <b>Isoxazole-Cu@2CO</b> | 1.137                         | <b>Isoxazole-Cu@2CO<sub>2</sub></b> | 0.596                         | <b>Isoxazole-Cu@2CH<sub>4</sub></b> | 0.494                         |
| <b>Isoxazole-Cu@3CO</b> | 0.790                         | <b>Isoxazole-Cu@3CO<sub>2</sub></b> | 0.451                         | <b>Isoxazole-Cu@3CH<sub>4</sub></b> | 0.340                         |
| <b>Isoxazole-Cu@4CO</b> | 0.274                         | <b>Isoxazole-Cu@4CO<sub>2</sub></b> | 0.366                         |                                     |                               |

#### Isothiazole System

| <b>System</b>             | <b>Adv. Adsorption Energy</b> | <b>System</b>                         | <b>Adv. Adsorption Energy</b> | <b>System</b>                         | <b>Adv. Adsorption Energy</b> |
|---------------------------|-------------------------------|---------------------------------------|-------------------------------|---------------------------------------|-------------------------------|
| <b>Isothiazole-Cu@1CO</b> | 1.708                         | <b>Isothiazole-Cu@1CO<sub>2</sub></b> | 1.006                         | <b>Isothiazole-Cu@1CH<sub>4</sub></b> | 0.906                         |
| <b>Isothiazole-Cu@2CO</b> | 1.099                         | <b>Isothiazole-Cu@2CO<sub>2</sub></b> | 0.581                         | <b>Isothiazole-Cu@2CH<sub>4</sub></b> | 0.476                         |
| <b>Isothiazole-Cu@3CO</b> | 0.763                         | <b>Isothiazole-Cu@3CO<sub>2</sub></b> | 0.433                         | <b>Isothiazole-Cu@3CH<sub>4</sub></b> | 0.326                         |
| <b>Isothiazole-Cu@4CO</b> | 0.590                         | <b>Isothiazole-Cu@4CO<sub>2</sub></b> | 0.359                         | <b>Isothiazole-Cu@4CH<sub>4</sub></b> | 0.251                         |

#### Pyrazole System

| <b>System</b>          | <b>Adv. Adsorption Energy</b> | <b>System</b>                      | <b>Adv. Adsorption Energy</b> | <b>System</b>                      | <b>Adv. Adsorption Energy</b> |
|------------------------|-------------------------------|------------------------------------|-------------------------------|------------------------------------|-------------------------------|
| <b>Pyrazole-Cu@1CO</b> | 0.831                         | <b>Pyrazole-Cu@1CO<sub>2</sub></b> | 0.819                         | <b>Pyrazole-Cu@1CH<sub>4</sub></b> | 0.907                         |

|                        |       |                                    |       |                                    |       |
|------------------------|-------|------------------------------------|-------|------------------------------------|-------|
| <b>Pyrazole-Cu@2CO</b> | 0.951 | <b>Pyrazole-Cu@2CO<sub>2</sub></b> | 1.082 | <b>Pyrazole-Cu@2CH<sub>4</sub></b> | 0.487 |
| <b>Pyrazole-Cu@3CO</b> | 0.788 | <b>Pyrazole-Cu@3CO<sub>2</sub></b> | 0.618 | <b>Pyrazole-Cu@3CH<sub>4</sub></b> | 0.334 |
| <b>Pyrazole-Cu@4CO</b> | ----- | <b>Pyrazole-Cu@4CO<sub>2</sub></b> | 0.579 | <b>Pyrazole-Cu@4CH<sub>4</sub></b> | 0.259 |

### Thiazole System

| <b>System</b>          | <b>Adv. Adsorption Energy</b> | <b>System</b>                      | <b>Adv. Adsorption Energy</b> | <b>System</b>                      | <b>Adv. Adsorption Energy</b> |
|------------------------|-------------------------------|------------------------------------|-------------------------------|------------------------------------|-------------------------------|
| <b>Thiazole-Cu@1CO</b> | 0.819                         | <b>Thiazole-Cu@1CO<sub>2</sub></b> | 0.996                         | <b>Thiazole-Cu@1CH<sub>4</sub></b> | 0.892                         |
| <b>Thiazole-Cu@2CO</b> | 1.082                         | <b>Thiazole-Cu@2CO<sub>2</sub></b> | 0.569                         | <b>Thiazole-Cu@2CH<sub>4</sub></b> | 0.471                         |
| <b>Thiazole-Cu@3CO</b> | 0.618                         | <b>Thiazole-Cu@3CO<sub>2</sub></b> | 0.429                         | <b>Thiazole-Cu@3CH<sub>4</sub></b> | 0.322                         |
| <b>Thiazole-Cu@4CO</b> | 0.579                         | <b>Thiazole-Cu@4CO<sub>2</sub></b> | -----                         | <b>Thiazole-Cu@4CH<sub>4</sub></b> | 0.250                         |

### Oxazole-O System

| <b>System</b>           | <b>Adv. Adsorption Energy</b> | <b>System</b>                       | <b>Adv. Adsorption Energy</b> | <b>System</b>                       | <b>Adv. Adsorption Energy</b> |
|-------------------------|-------------------------------|-------------------------------------|-------------------------------|-------------------------------------|-------------------------------|
| <b>Oxazole-O-Cu@1CO</b> | 1.793                         | <b>Oxazole-O-Cu@1CO<sub>2</sub></b> | 1.104                         | <b>Oxazole-O-Cu@1CH<sub>4</sub></b> | 1.015                         |
| <b>Oxazole-O-Cu@2CO</b> | 1.253                         | <b>Oxazole-O-Cu@2CO<sub>2</sub></b> | 0.680                         | <b>Oxazole-O-Cu@2CH<sub>4</sub></b> | 0.577                         |
| <b>Oxazole-O-Cu@3CO</b> | 1.039                         | <b>Oxazole-O-Cu@3CO<sub>2</sub></b> | 0.535                         | <b>Oxazole-O-Cu@3CH<sub>4</sub></b> | 0.405                         |
| <b>Oxazole-O-Cu@4CO</b> | 0.686                         | <b>Oxazole-O-Cu@4CO<sub>2</sub></b> | 0.438                         | <b>Oxazole-O-Cu@4CH<sub>4</sub></b> | 0.313                         |

### Oxazole-N System

| <b>System</b>           | <b>Adv. Adsorption Energy</b> | <b>System</b>                       | <b>Adv. Adsorption Energy</b> | <b>System</b>                        | <b>Adv. Adsorption Energy</b> |
|-------------------------|-------------------------------|-------------------------------------|-------------------------------|--------------------------------------|-------------------------------|
| <b>Oxazole-O-Cu@1CO</b> | 1.711                         | <b>Oxazole-N-Cu@1CO<sub>2</sub></b> | 1.023                         | <b>Oxazole-N-Cu @1CH<sub>4</sub></b> | 0.918                         |
| <b>Oxazole-O-Cu@2CO</b> | 0.901                         | <b>Oxazole-N-Cu@2CO<sub>2</sub></b> | 0.590                         | <b>Oxazole-N-Cu @2CH<sub>4</sub></b> | 0.488                         |

|                         |       |                                     |       |                                      |       |
|-------------------------|-------|-------------------------------------|-------|--------------------------------------|-------|
| <b>Oxazole-O-Cu@3CO</b> | 0.882 | <b>Oxazole-N-Cu@3CO<sub>2</sub></b> | 0.443 | <b>Oxazole-N-Cu @3CH<sub>4</sub></b> | 0.338 |
| <b>Oxazole-O-Cu@4CO</b> | 0.599 | <b>Oxazole-N-Cu@4CO<sub>2</sub></b> | 0.364 | <b>Oxazole-N-Cu @4CH<sub>4</sub></b> | 0.259 |

**Table ST3:** NBO charges on metal center of gradual green house gases adsorb different aromatic model systems decorated with Cu(I) at B3LYP/6-31+g (d, p) level of theory.

#### Imidazole system

| System                  | NBO    | System                              | NBO   | System                              | NBO   |
|-------------------------|--------|-------------------------------------|-------|-------------------------------------|-------|
| <b>Imidazole-Cu</b>     | 0.863  | <b>Imidazole-Cu</b>                 | 0.863 | <b>Imidazole-Cu</b>                 | 0.863 |
| <b>Imidazole-Cu@1CO</b> | 0.626  | <b>Imidazole-Cu@1CO<sub>2</sub></b> | 0.759 | <b>Imidazole-Cu@1CH<sub>4</sub></b> | 0.737 |
| <b>Imidazole-Cu@2CO</b> | 0.372  | <b>Imidazole-Cu@2CO<sub>2</sub></b> | 0.754 | <b>Imidazole-Cu@2CH<sub>4</sub></b> | 0.731 |
| <b>Imidazole-Cu@3CO</b> | -0.029 | <b>Imidazole-Cu@3CO<sub>2</sub></b> | 0.744 | <b>Imidazole-Cu@3CH<sub>4</sub></b> | 0.733 |
| <b>Imidazole-Cu@4CO</b> | -0.029 | <b>Imidazole-Cu@4CO<sub>2</sub></b> | 0.742 | <b>Imidazole-Cu@4CH<sub>4</sub></b> | 0.730 |

#### Isoxazole System

| System                  | NBO   | System                              | NBO   | System                               | NBO   |
|-------------------------|-------|-------------------------------------|-------|--------------------------------------|-------|
| <b>Isoxazole-Cu</b>     | 0.890 | <b>Isoxazole-Cu</b>                 | 0.89  | <b>Isoxazole-Cu</b>                  | 0.890 |
| <b>Isoxazole-Cu@1CO</b> | 0.788 | <b>Isoxazole-Cu@1CO<sub>2</sub></b> | 0.781 | <b>Isoxazole-Cu@ 1CH<sub>4</sub></b> | 0.752 |
| <b>Isoxazole-Cu@2CO</b> | 0.376 | <b>Isoxazole-Cu@2CO<sub>2</sub></b> | 0.771 | <b>Isoxazole-Cu@ 2CH<sub>4</sub></b> | 0.736 |
| <b>Isoxazole-Cu@3CO</b> | 0.351 | <b>Isoxazole-Cu@3CO<sub>2</sub></b> | 0.742 | <b>Isoxazole-Cu@ 3CH<sub>4</sub></b> | 0.727 |

|                          |       |                                   |       |
|--------------------------|-------|-----------------------------------|-------|
| <b>Isoxazole-Cu@ 4CO</b> | 0.735 | <b>isoxazoleCu4CO<sub>2</sub></b> | 0.741 |
|--------------------------|-------|-----------------------------------|-------|

### Isothiazole System

| System                    | NBO   | System                                           | NBO   | System                                | NBO   |
|---------------------------|-------|--------------------------------------------------|-------|---------------------------------------|-------|
| <b>Isothiazole-Cu</b>     | 0.877 | <b>Isothiazole-Cu</b>                            | 0.877 | <b>Isothiazole-Cu</b>                 | 0.877 |
| <b>Isothiazole-Cu@1CO</b> | 0.634 | <b>Isothiazole-Cu@1CO<sub>2</sub></b>            | 0.774 | <b>Isothiazole-Cu@1CH<sub>4</sub></b> | 0.746 |
| <b>Isothiazole-Cu@2CO</b> | 0.377 | <b>Isothiazole-Cu<sub>2</sub>@CO<sub>2</sub></b> | 0.764 | <b>Isothiazole-Cu@2CH<sub>4</sub></b> | 0.732 |
| <b>Isothiazole-Cu@3CO</b> | 0.353 | <b>Isothiazole-Cu@3CO<sub>2</sub></b>            | 0.751 | <b>Isothiazole-Cu@3CH<sub>4</sub></b> | 0.727 |
| <b>Isothiazole-Cu@4CO</b> | 0.354 | <b>Isothiazole-Cu<sub>4</sub>@CO<sub>2</sub></b> | 0.737 | <b>Isothiazole-Cu@4CH<sub>4</sub></b> | 0.721 |

### Pyrazole System

| System                 | NBO   | System                             | NBO   | System                             | NBO   |
|------------------------|-------|------------------------------------|-------|------------------------------------|-------|
| <b>Pyrazole-Cu</b>     | 0.861 | <b>Pyrazole-Cu</b>                 | 0.861 | <b>Pyrazole-Cu</b>                 | 0.861 |
| <b>Pyrazole-Cu@1CO</b> | 0.763 | <b>Pyrazole-Cu@1CO<sub>2</sub></b> | 0.755 | <b>Pyrazole-Cu@1CH<sub>4</sub></b> | 0.729 |
| <b>Pyrazole-Cu@2CO</b> | 0.613 | <b>Pyrazole-Cu@2CO<sub>2</sub></b> | 0.754 | <b>Pyrazole-Cu@2CH<sub>4</sub></b> | 0.727 |

|                        |       |                                    |       |                                    |       |
|------------------------|-------|------------------------------------|-------|------------------------------------|-------|
| <b>Pyrazole-Cu@3CO</b> |       | <b>Pyrazole-Cu@3CO<sub>2</sub></b> |       | <b>Pyrazole-Cu@3CH<sub>4</sub></b> |       |
|                        | 0.358 |                                    | 0.748 |                                    | 0.728 |
| <b>Pyrazole-Cu@4CO</b> | ----- | <b>Pyrazole-Cu@4CO<sub>2</sub></b> |       | <b>Pyrazole-Cu@4CH<sub>4</sub></b> |       |
|                        |       |                                    | 0.732 |                                    | 0.721 |

### Thiazole System

| System                 | NBO   | System                             | NBO   | System                             | NBO   |
|------------------------|-------|------------------------------------|-------|------------------------------------|-------|
| <b>Thiazole-Cu</b>     | 0.861 | <b>Thiazole-Cu</b>                 | 0.861 | <b>Thiazole-Cu</b>                 | 0.861 |
| <b>Thiazole-Cu@1CO</b> | 0.771 | <b>Thiazole-Cu@1CO<sub>2</sub></b> | 0.765 | <b>Thiazole-Cu@1CH<sub>4</sub></b> | 0.743 |
| <b>Thiazole-Cu@2CO</b> | 0.382 | <b>Thiazole-Cu@2CO<sub>2</sub></b> | 0.761 | <b>Thiazole-Cu@2CH<sub>4</sub></b> | 0.735 |
| <b>Thiazole-Cu@3CO</b> | 0.622 | <b>Thiazole-Cu@3CO<sub>2</sub></b> | 0.752 | <b>Thiazole-Cu@3CH<sub>4</sub></b> | 0.731 |
| <b>Thiazole-Cu@4CO</b> | 0.356 | <b>Thiazole-Cu@4CO<sub>2</sub></b> | ----- | <b>Thiazole-Cu@4CH<sub>4</sub></b> | 0.726 |

### Oxazole-O System

| System                        | NBO   | System                                     | NBO   | System                                   | NBO   |
|-------------------------------|-------|--------------------------------------------|-------|------------------------------------------|-------|
| <b>Oxazole-O-Cu</b>           | 0.931 | <b>Oxazole-O-Cu</b>                        | 0.931 | <b>Oxazole-O-Cu</b>                      | 0.931 |
| <b>Oxazole-O-Cu<br/>@1CO</b>  | 0.710 | <b>Oxazole-O-Cu<br/>@1CO<sub>2</sub></b>   | 0.841 | <b>Oxazole-O-Cu<br/>@1CH<sub>4</sub></b> | 0.812 |
| <b>Oxazole-O-Cu<br/>@2CO</b>  | 0.427 | <b>Oxazole-O-Cu<br/>@2CO<sub>2</sub></b>   | 0.820 | <b>Oxazole-O-Cu<br/>@2CH<sub>4</sub></b> | 0.743 |
| <b>Oxazole-O-Cu<br/>@3CO</b>  | 0.102 | <b>Oxazole-O-Cu<br/>@3CO<sub>2</sub></b>   | 0.772 | <b>Oxazole-O-Cu<br/>@3CH<sub>4</sub></b> | 0.704 |
| <b>Oxazole-O-Cu<br/>@4 CO</b> | 0.424 | <b>Oxazole-O-Cu<br/>@ 4 CO<sub>2</sub></b> | 0.775 | <b>Oxazole-O-Cu<br/>@4CH<sub>4</sub></b> | 0.718 |

#### Oxazole-N System

| System                       | NBO    | System                                   | NBO   | System                                   | NBO   |
|------------------------------|--------|------------------------------------------|-------|------------------------------------------|-------|
| <b>Oxazole-N-Cu</b>          | 0.878  | <b>Oxazole-N-Cu</b>                      | 0.878 | <b>Oxazole-N-Cu</b>                      | 0.878 |
| <b>Oxazole-N-Cu<br/>@1CO</b> | 0.636  | <b>Oxazole-N-Cu<br/>@1CO<sub>2</sub></b> | 0.773 | <b>Oxazole-N-Cu<br/>@1CH<sub>4</sub></b> | 0.748 |
| <b>Oxazole-N-Cu<br/>@2CO</b> | 0.634  | <b>Oxazole-N-Cu<br/>@2CO<sub>2</sub></b> | 0.766 | <b>Oxazole-N-Cu<br/>@2CH<sub>4</sub></b> | 0.736 |
| <b>Oxazole-N-Cu<br/>@3CO</b> | -0.020 | <b>Oxazole-N-Cu<br/>@3CO<sub>2</sub></b> | 0.756 | <b>Oxazole-N-Cu<br/>@3CH<sub>4</sub></b> | 0.734 |
| <b>Oxazole-N-Cu<br/>@4CO</b> | 0.357  | <b>Oxazole-N-Cu<br/>@4CO<sub>2</sub></b> | 0.748 | <b>Oxazole-N-Cu<br/>@4CH<sub>4</sub></b> | 0.733 |

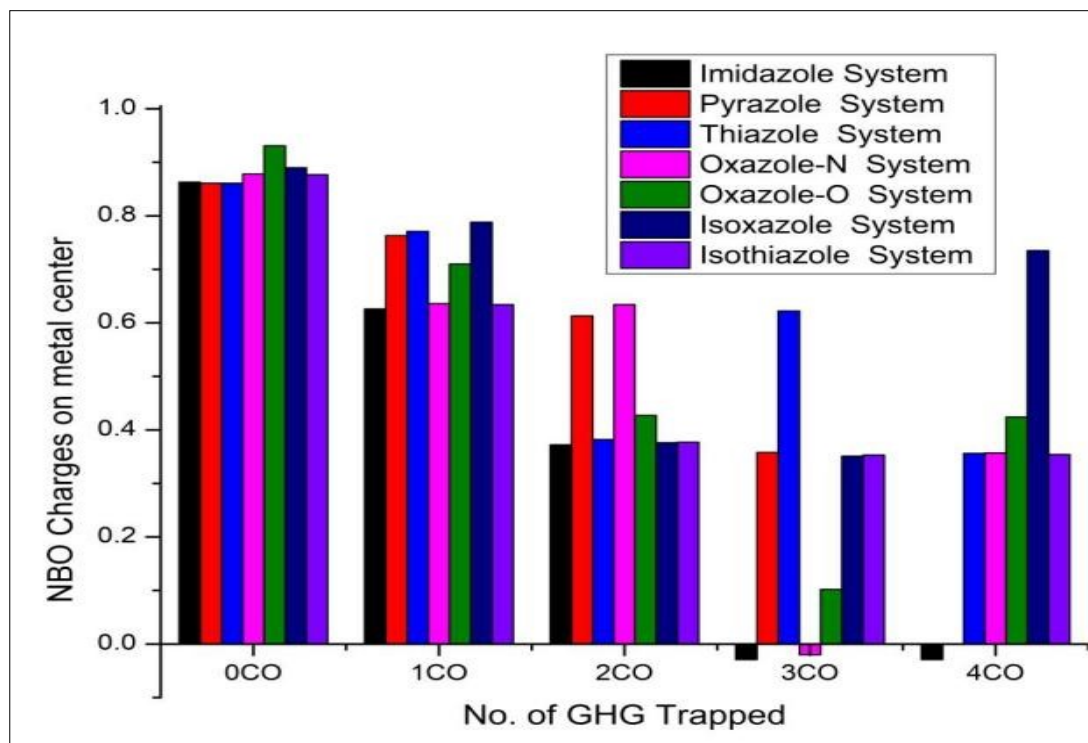

[A]

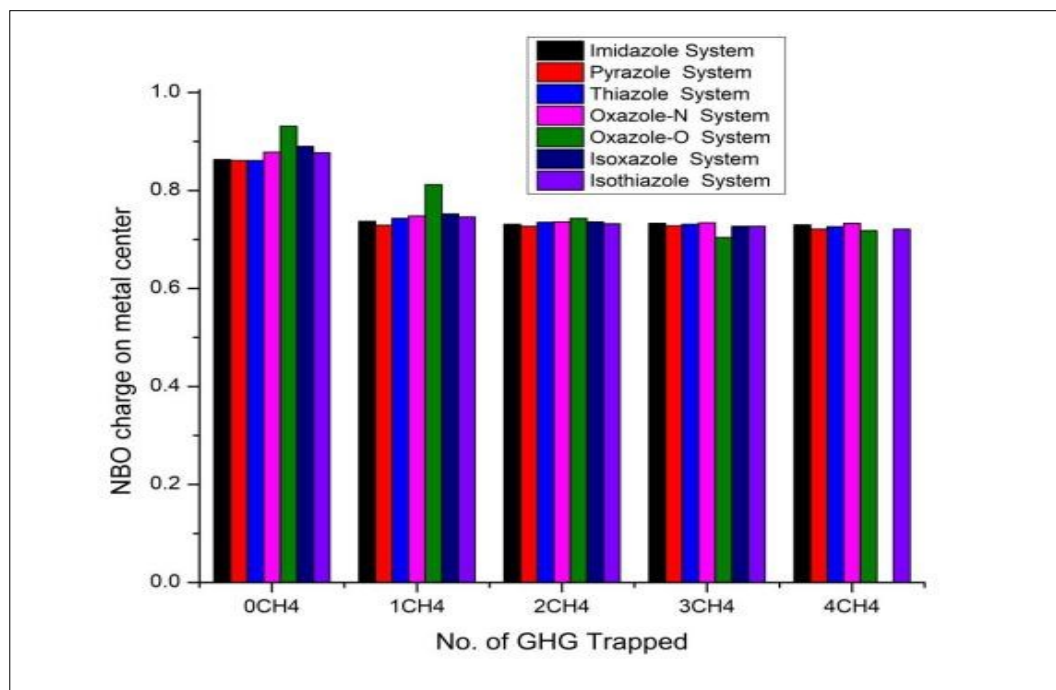

[B]

**Fig. SF3.** Variation of NBO charges on Cu center in hosts and their sequential different GHGs adsorb systems ([A] for CO, and [B] for CH<sub>4</sub>).

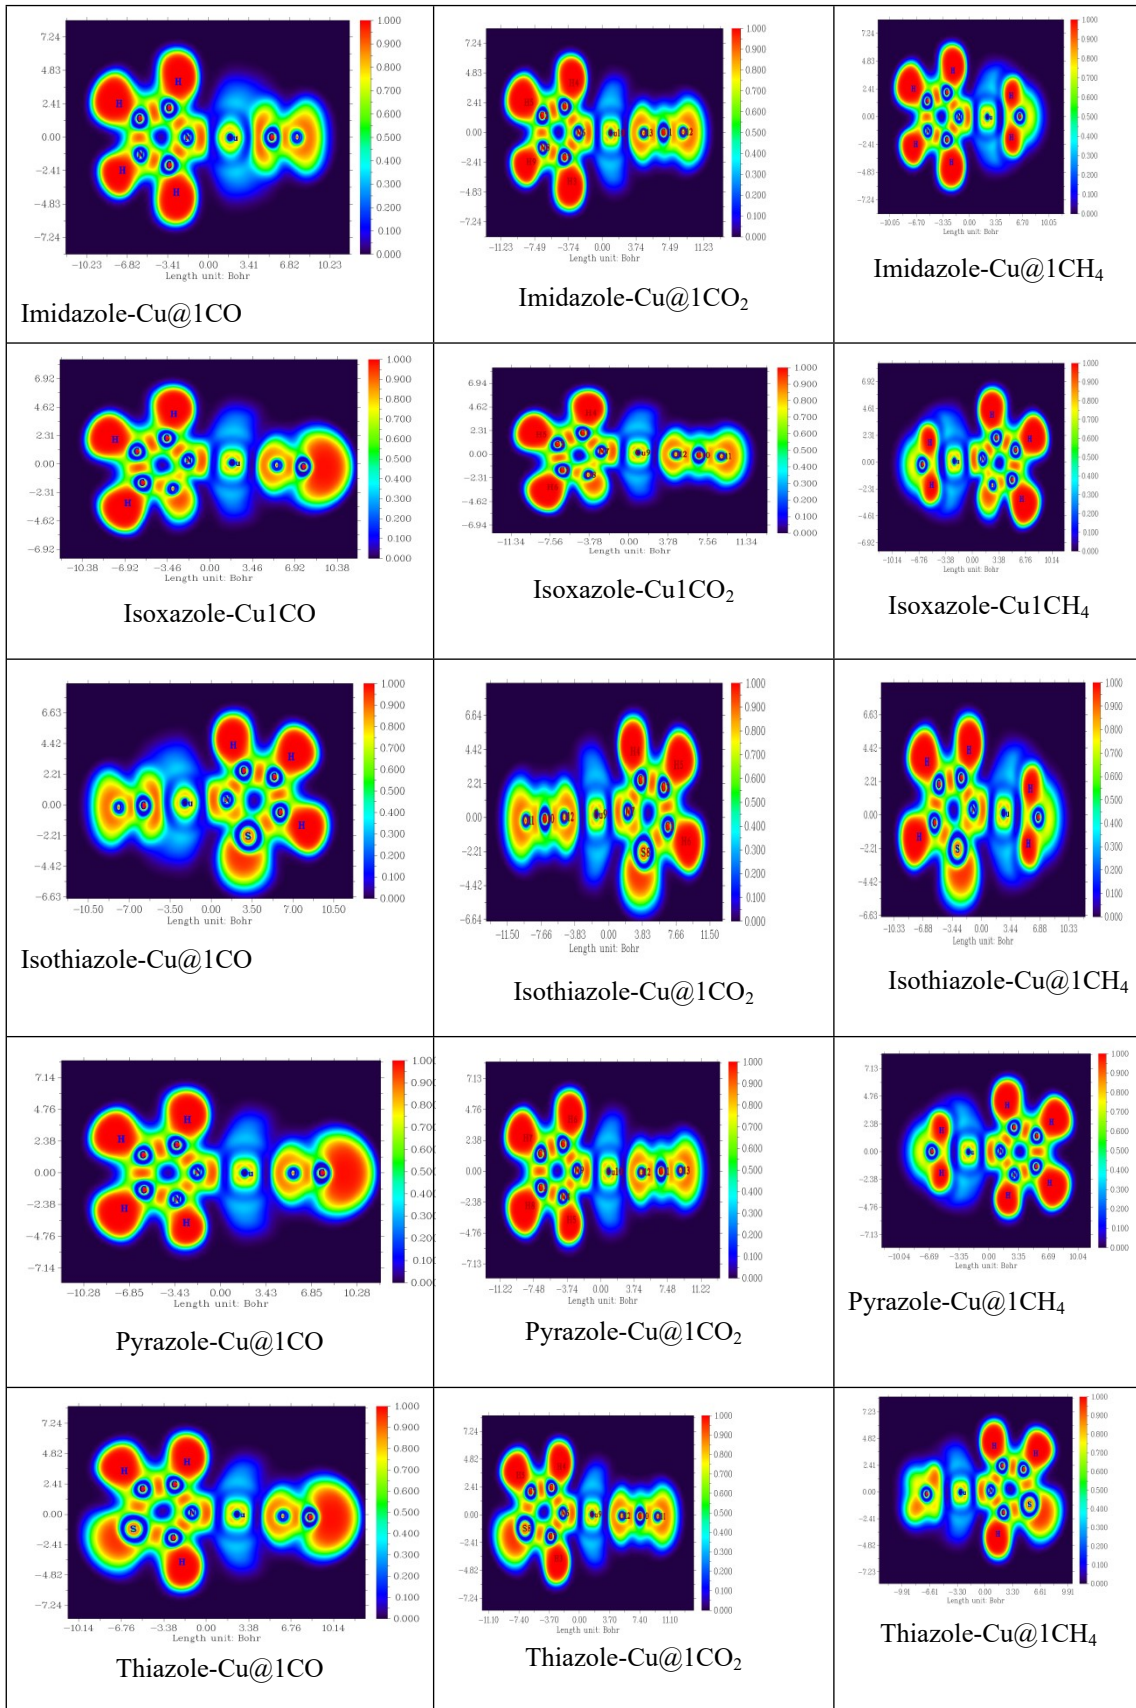

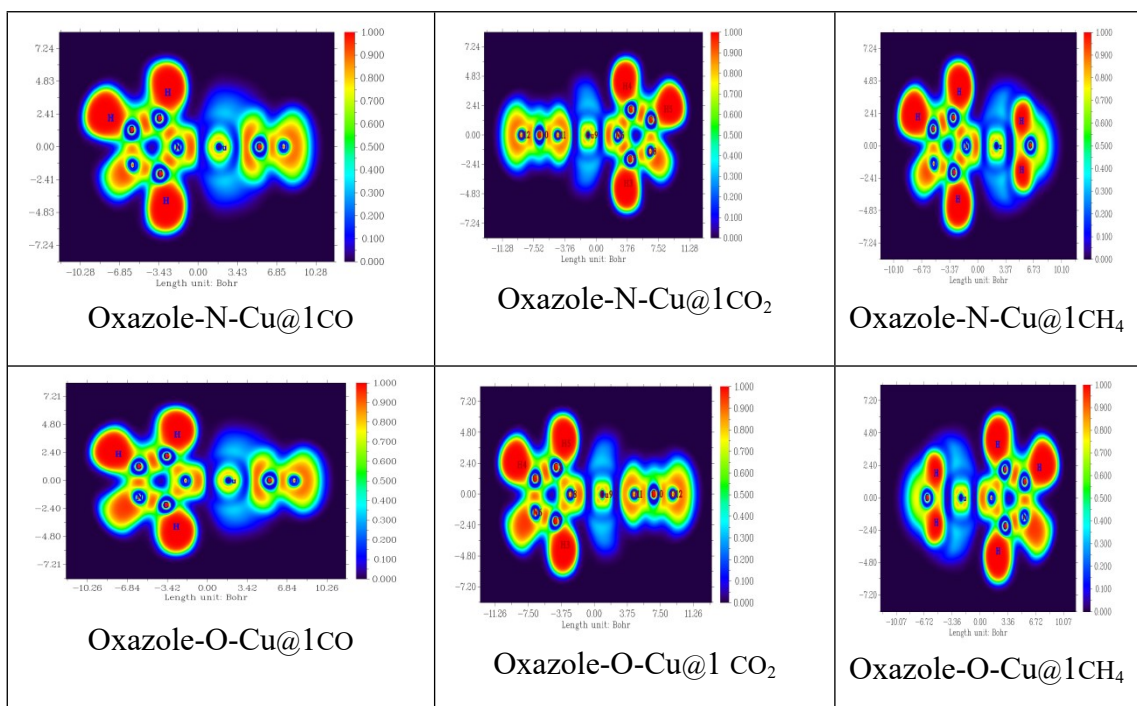

**Fig. SF4.** ELF plot of different GHGs adsorb different model systems decorated with Cu(I) at B3LYP/6-31+g (d, p) level of theory.
